# Supplementary figures and images for: G970R‐CFTR Mutation (c.2908G>C) Results Predominantly in a Splicing Defect
Source: PubMed Central journal article supplement — Clin Transl Sci. 2020 Dec 6;14(2):656–63. doi: 10.1111/cts.12927 (PMC7993255; doi:10.1111/cts.12927), 2020-12-06

**Positive controls**

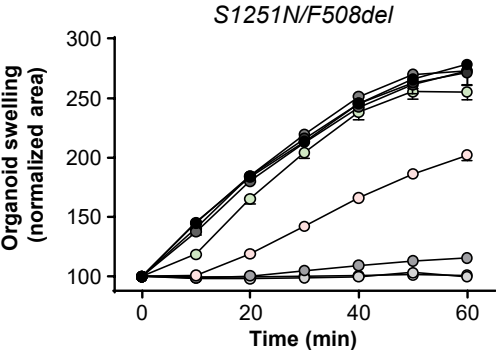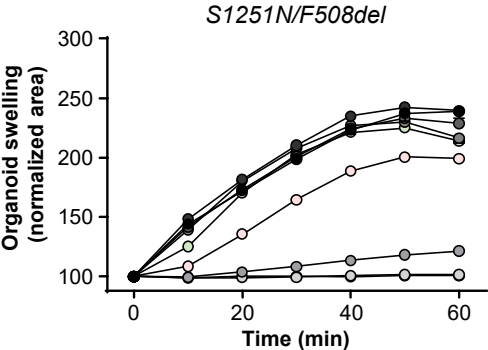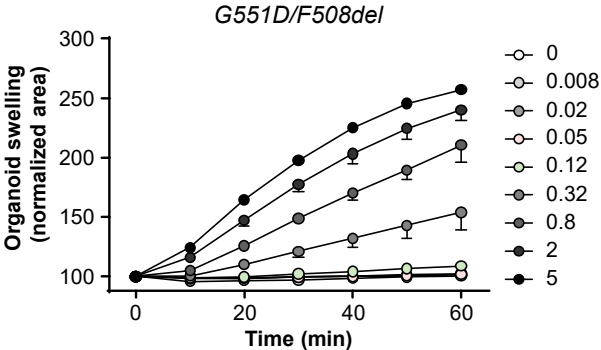

**G970R/F508del subjects**

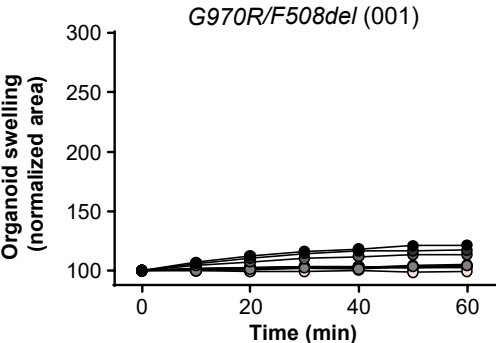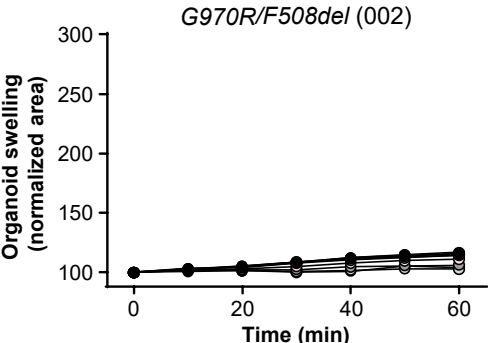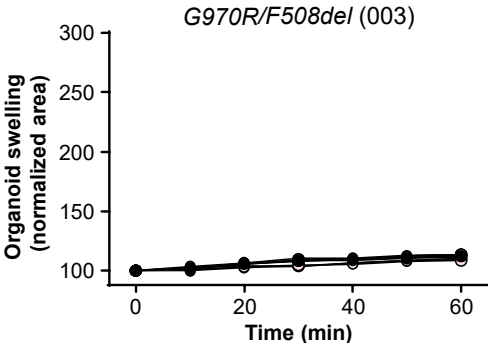

**Negative controls**

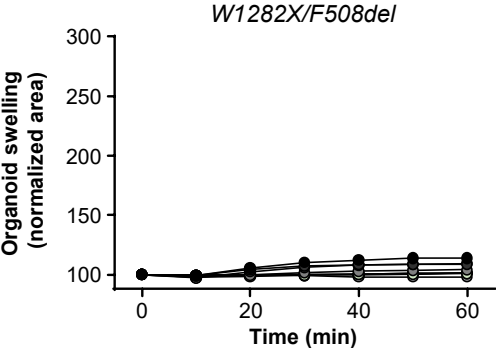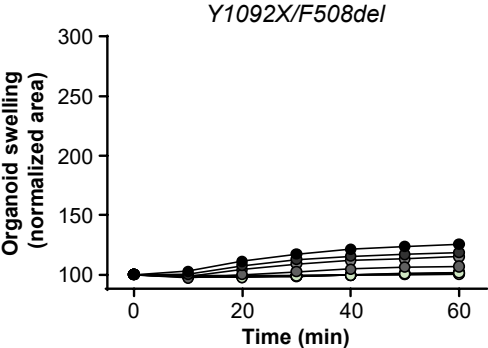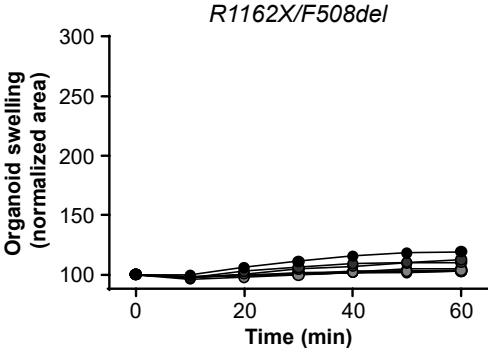

Supplement: CTS-14-656-s002.pdf [file CTS-14-656-s002.pdf]

## Positive controls

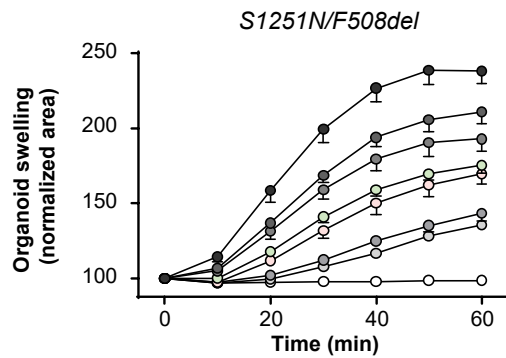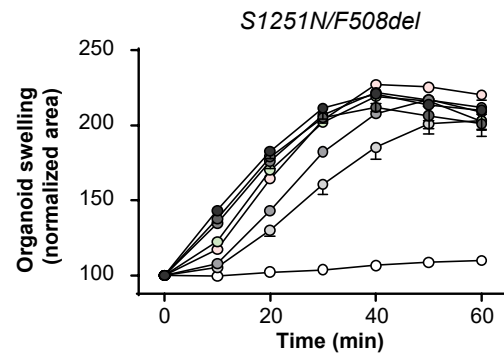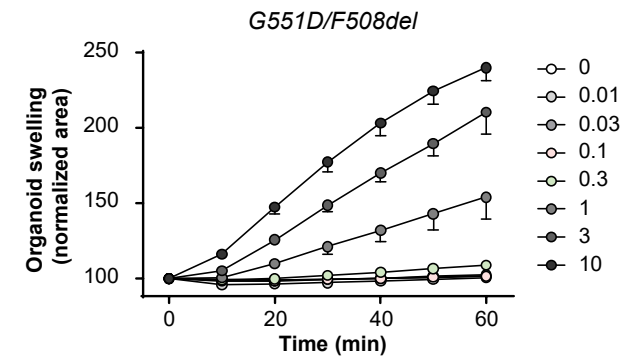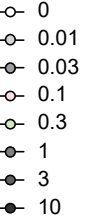

## G970R/F508del subjects

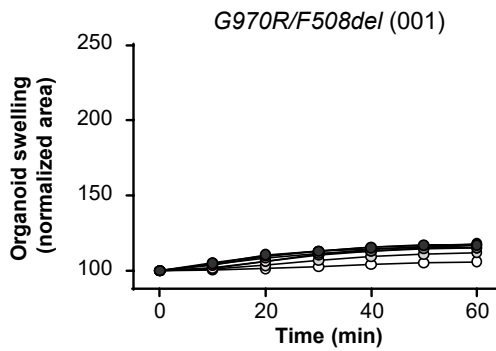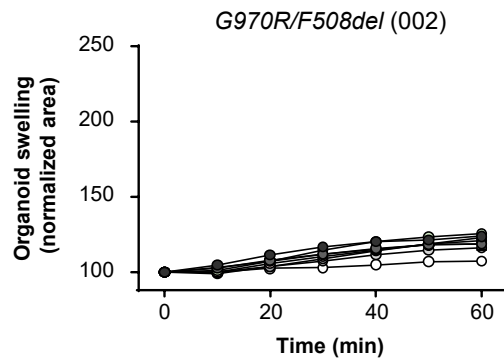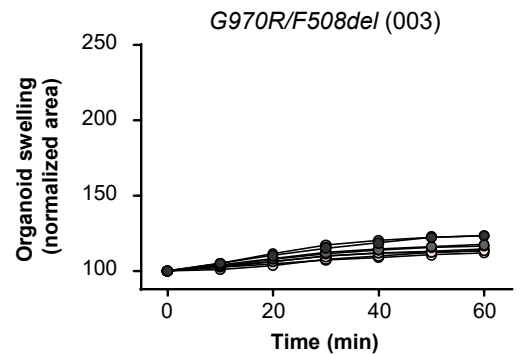

## Negative controls

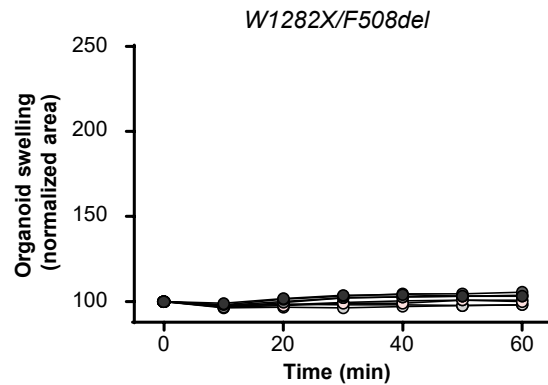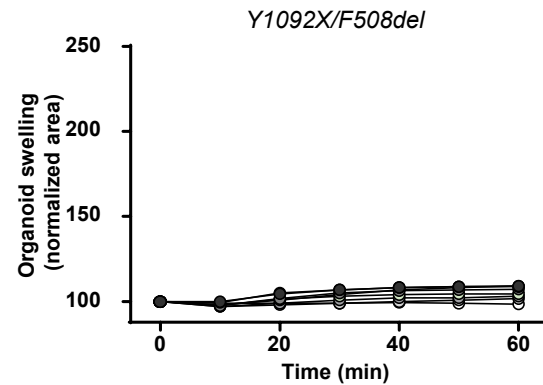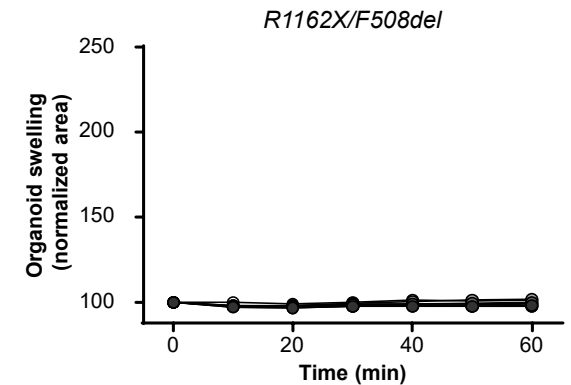

Supplement: CTS-14-656-s004.pdf [file CTS-14-656-s004.pdf]

**(a)**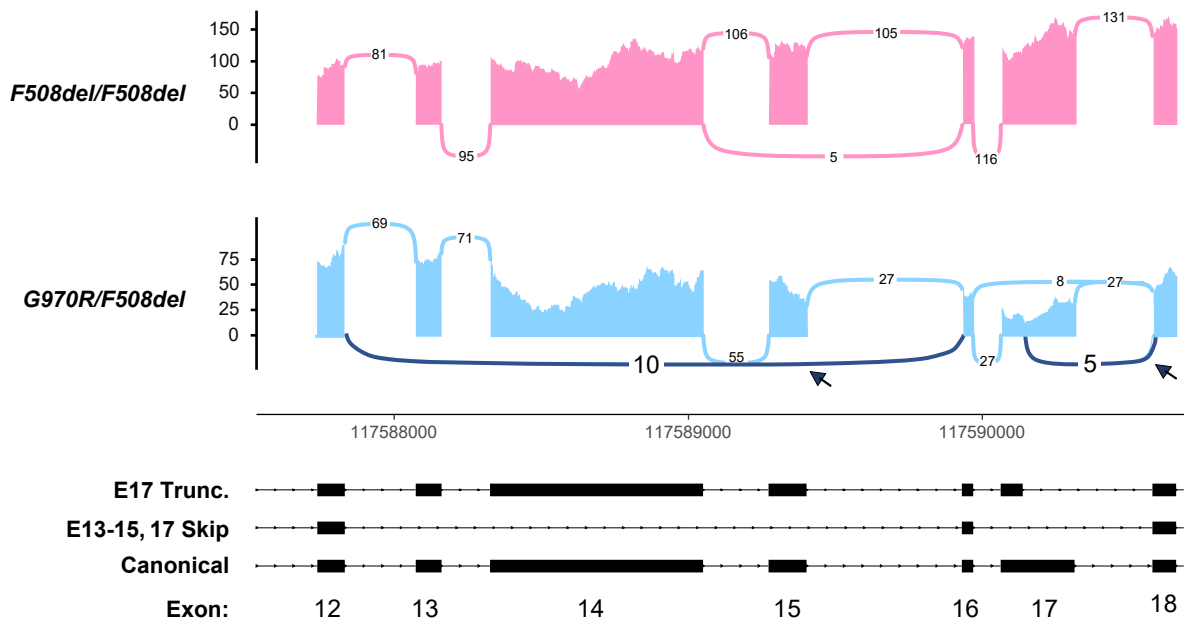**(b)**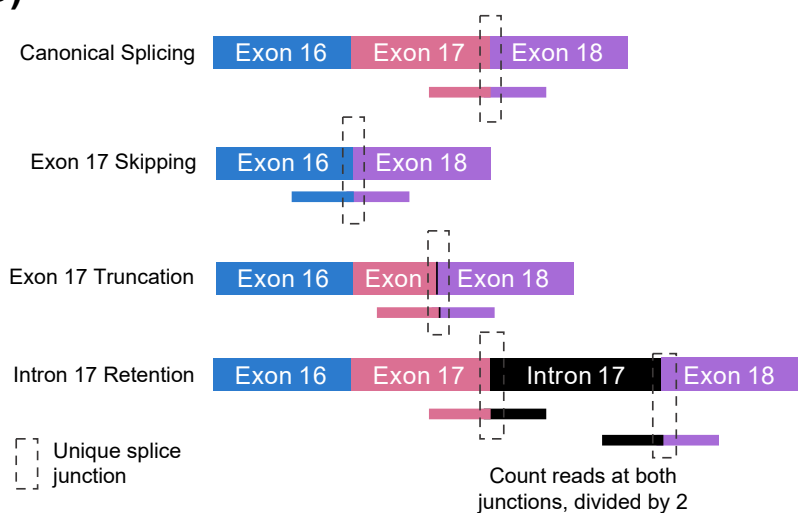**(c)**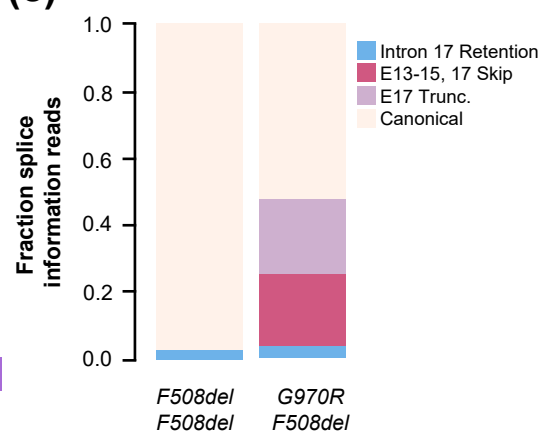

Supplement: CTS-14-656-s005.pdf [file CTS-14-656-s005.pdf]
